# Supplementary material
Source: HighWire-hosted journal article supplement (doi:10.1101/rna.078773.121)
Supplement: Supplemental_Material.docx [file Supplemental_Material.docx]

**Supporting Information**

**A – Phylogenetic comparison of tmRNA sequences**

*E. coli* GGGGCUGAUUCUGGAUUCGACGGGAUUUGC--GAAACCC-AAGGUGCAUGCCGAGG--GGCGGUUGGCCUCGUAAAA-------AGCCGCA----AAAAAUAGUC 89

*K. pneumoniae* GGGGCUGAUUCUGGAUUCGACGGGAUUUGC--GAAACCC-AAGGUGCAUGCCGAGG--GGCGGUUGGCCUCGUAAAA-------AGCCGCA----AAAAAUAGUC 89

*E. cloacae* GGGGCUGAUUCUGGAUUCGACGGGAUUUGC--GAAACCC-AAGGUGCAUGCCGAGG--GGCGGUUUGCCUCGUAAA-------AAGCCGCA---AAAAAAUAGUC 90

*A. baumannii* GGGGAUGUUAUUGGCUUCGACGCCGGUGAU--GAAACUCAUAGAUGCAUGCCGAGAG-CGCAUUUUCUCUCGUAAAUAA----AAUUUGCA---UUUAAAUAGUC 95

*P. aeruginosa* GGGGCCGAU-UAGGAUUCGACGCCGGUAAC--AAAACUU-GAGGGGCAUGCCGAGCU-GGUAGCAGAACUCGUAAAUUCG---CUGCUGCA---AACUUAUAGUU 94

*E. faecium* GGGGACG-UUACGGAUUCGACAGGCACAGUC--GA-GCUUGAAUUGCGUUUCGUAG-GUUACGU---CUACGUAAAA-------ACGUUACAGUUAAAUAUAACU 90

*S. aureus* GGGGACGUUCAUGGAUUCGACAGGGGUCCCCC-GA-GCUCAUUAAGCGUGUCGGAG--GGUUGU---CUUCGUCAUCAACACACACAGUU-----UAUAAUAACU 93

**** * * ** ****** * ** * ** *** * ***

*E. coli* GCAAACGACGAAAAC------UACGCUUUAGCAGCUUAA---UAACCUGCUUAGAGCCCUCUCUCCCUAGCCUCCGCUCUUAGGACGGGGA--UCAAGAGAGG-- 181

*K. pneumoniae* GCAAACGACGAAAAC------UACGCUUUAGCAGCUUAA---UAACCUGCUCUGAGCCCUCUCUCCCUAGCUUCCGCUCUUAAGACGGGGA-UCAAAGAGAGG-- 182

*E. cloacae* GCAAACGACGAAAAC------UACGCUUUAGCAGCUUAA---UAACCUGCUCUGAGCCCUCUCUCCCUAGCUUCCGCUCUUAAGACGGGGA-UUCAAGAGAGG-- 183

*A. baumannii* GCAAACGACGAAACU------UACGCUCUAGCUGCCUAA---------GGGCCGCUUGUCCGCUUCCUAGAAU--ACUUGUGGUCUGGGAACCCGAC-------- 175

*P. aeruginosa* GCCAACGACGACAAC------UACGCUCUAGCUGCUUAA---------UGCGGCUAGCAGUCGCUAGGGGAU---GCCUGUAAACCCGAAACGACUG-------- 173

*E. faecium* GCUAAAAACGAAAACAACUCUUACGCUUUAGCUGCCUAAAAA-CAGUUAGCGUA---GAUCCUCUCGGCAUC---GCCCAU-GUGCUCGAGUAAGGGUCCUAACU 187

*S. aureus* GGCAAAUCAAACAAU---AAUUUCGCAGUAGCUGCCUAAUC-GCACUCUGC------AUCGCCUAACAGCAUU--UCCUAU-AUGCUGUUAACGCGAUUCAACCU 185

* ** * * * *** **** ** *** * *

*E. coli* -------UCAAACCCAAAAGAGAUCGCGU-GGAAGCCCU-GCCUGGGGUUGAAGCGU--UAAAACUUAAUCAGGC-UA---GUUUGUUAGUGGCGUGUCCGUCCG 271

*K. pneumoniae* -------UCAAACCCAAAAGAGAUCGCGU-GGAUGCCCU-GCCUGGGGUUGAAGCGU--UAAAUCU-CAUCAGGC-UA---GUUUGUUAGUGGCGUGUCUGUCCG 271

*E. cloacae* -------UCAAACCCAAAAGAGAUCGCGU-GGAAGCCCU-GCCUGGGGUUGAAGCGU--UAAAACU-AAUCAGGC-UA---GUACGUUAGUGGCGUGUUUGUUCG 272

*A. baumannii* ---UGAAGCGCACGCACACAAGUCCGUAUAGAGUCAA---GCCUCGGGGCUUUAUAC--CAAACUUA----GAGGAUC--GCACUUUGU--ACCCU-GUUCGUC- 262

*P. aeruginosa* -------UCA-GAUAGAACAGGAUCGCCGCCAAGUUC--GCUGUAGACGUAACGGC---UAAAACUCA-UACAGC-UC----GCUCCA-AGCACCCUGCCACUCG 258

*E. faecium* UUA------------GUGGGAUAC-GUUUCAACUUUCC-GUCUGU--AAGUUGAAAAAGAGAACAU----CAGAC-UAGCGAUACAGAA--UGCCU-GUCACUCG 268

*S. aureus* UA-------------AUAGGAUAU-GCUAAACACUGCC-GUUUGAAGUCUGUUUAGAAGAAACUUAA--UCAAGC-UAGCAUCAUGU----UGGUU-GUUUAUCA 267

* * * *

*E. coli* CAGCUGGCAAGC-----GAAUGUAAA---GAC-UGA-CUAAGCAUGUAGUACCGAGGAUGU--AGGAAUUUCGGACGCGGGUUCAACUCCCGCCAGCUCCACCA 363

*K. pneumoniae* CAGCUGGCAAGC-----GAAUGUAAA---GAC-UGA-CUAAGCAUGUAGUGCCGAGGAUGU--AGGAAUUUCGGACGCGGGUUCAACUCCCGCCAGCUCCACCA 363

*E. cloacae* CAGCUGGCGUGC-----GAAUGUAAA---GAC-AAA-CUAAGCAUGUAGUACCGAGGAUGU--AGAAAUUUCGGACGCGGGUUCAACUCCCGCCAGCUCCACCA 364

*A. baumannii* GGGU-CACUUGGUGU--UAAAACAAUA--GACGAUAUCUAAGCAUGUAGUAUUCUCGAGCG-UAGUGCUGGCGGACGCGGGUUCAACUCCCGCCAUCUCCACCA 360

*P. aeruginosa* GGCGGCGCGGAGU-----UAACUCAGUA-GAGCUGG-CUAAGCAUGUAGAACCGAUAGCGG--AGAGCUGGCGGACGGGGGUUCAAAUCCCCCCGGCUCCACCA 353

*E. faecium* GCAAGCUGUAAAGU-GAAUCCUUAAAU--GAGUUGA-CUAUGAACGUAG-AUUUUUAAGUGGCGAUGUGUUUGGACGCGGGUUCGACUCCCGCCGUCUCCAuug 367

*S. aureus* CUUUUCAUGA-UGC-GAAACCUUUC----GA-UAAA-CUACACACGUAG-AAAGAUGUGUAUCAGGACCUCUGGACGCGGGUUCAAAUCCCGCCGUCUCCAuau 362

** *** * **** * ***** ****** * **** ** *****

Adapted from the tmRNA Website by Kelly Williams and Corey Hudson (All tmRNA Alignment 08-JUL-2014), with base-pairing color-coded (P1, P2, P3, P4, MLD, P5, P6, P7, P8, P9, P10, P11, and P12). The predicted reading frame for the proteolysis-inducing peptide tag is underlined, and the portions of the expected 3′ CCA tail that are not encoded in the genome are lowercase.

**B – Phylogenetic comparison of SmpB amino-acid sequences**


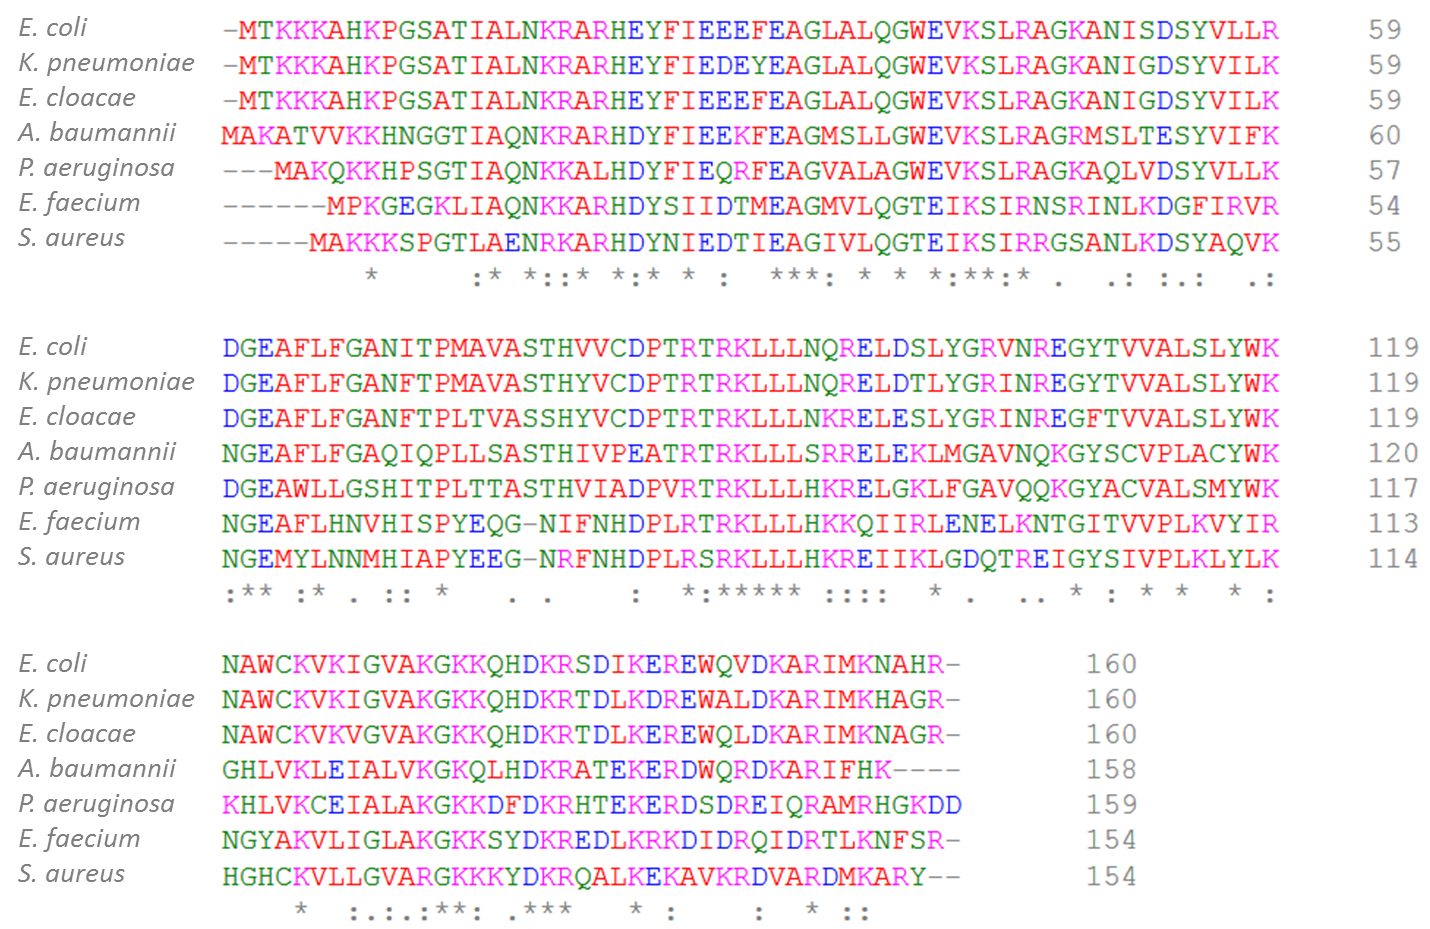


Residue properties are color-coded: small [small+ hydrophobic (incl.aromatic -Y)]; acidic; basic – H; Hydroxyl + sulfhydryl + amine + G, unusual amino or imino acids, etc. Key: *, positions having a single and fully conserved residue; . , weakly similar properties conserved between groups; :, strongly similar

properties conserved between groups.

**Supplementary Figure 1. Phylogenetic comparison of SmpBs and tmRNAs from ESKAPE pathogens and *E. coli*.** A) Shown here are the RNA sequences of tmRNAs and B) the SmpB amino acid sequences (Clustal Omega) from ESKAPE and *E. coli* bacteria.

**Supplementary Figure 2**. **Schematic illustrations of tmRNA secondary structures as well as production patterns of tmRNA and SmpB variants.** (A) Wild-type tmRNA, with a black transfer-like domain (TLD) and blue messenger-like domain (MLD). (B) Mutated tmRNAGFP11 has an engineered MLD (light green) that encodes the eleventh GFP beta-strand. Compensatory mutations (dark green) maintain the base-pairing interactions of the H5 helix, and the 3′-ends for all species are CCA. (C) Version 2 mutated tmRNAGFP11. An engineered MLD encoding the eleventh GFP beta-strand is green, the WT 3′-end MLD is blue, and the WT H5 helix is gray. (D)Visualization of ESKAPE tmRNAGFP11 variants (5 pmol) on 8% urea-PAGE, with *E. coli* tmRNAGFP11 used as a control. (E) As C, but showing 50 pmol *E. coli* and ESKAPE SmpB on 15% SDS-PAGE. Key: M1, RNA Century™-Plus Markers (ThermoFisher Scientific), M2, PageRuler™ Prestained Protein Ladder, 10 to 180 kDa (ThermoFisher Scientific), E, *Enterococcus faecium*; S, *Staphylococcus aureus*; K, *Klebsiella pneumoniae*; A, *Acinetobacter baumannii*; P, *Pseudomonas aeruginosa*; E*, *Enterobacter cloacae*.

**Supplementary Figure 3:** Arbitrary units of fluorescence for the controls of the *E. coli* and ESKAPE homologous systems translation assays. The smaller the gain unit is, the higher is the fluorescence detected by the equipment.

**Supplementary Table 1:** *E. coli* and ESKAPE tmRNAGFP11 sequences for *trans*-translation *in vitro*. The eleventh beta-strand is light green and the compensatory mutations forming the helix H5 are darker green.

| **Species and Accession** | **tmRNAGFP11 sequence** |
| --- | --- |
| *E. faecium*  NC_017960.1/1726235-1726601 | GGGGACGUUACGGAUUCGACAGGCACAGUCGAGCUUGAAUUGCGUUUCGUAGGUUACGUCUACGUAAAAACGUUACAGUUAAAUAUAACU**GCACGUGACCACAUGGUCCUUCAUGAGUACGUAAAUGCUGCUGGGAUUACAUAAUAACCUAAUCCUAGC**GAUCCUCUCGGCAUCGCCCAUGUGCUCGAGUAAGGGUCCUAACUUUAGUGGGAUACGUUUCAACUUUCCGUCUGUAAGUUGAAAAAGAGAACAUCAGACUAGCGAUACAGAAUGCCUGUCACUCGGCAAGCUGUAAAGUGAAUCCUUAAAUGAGUUGACUAUGAACGUAGAUUUUUAAGUGGCGAUGUGUUUGGACGCGGGUUCGACUCCCGCCGUCUCCACCA |
| *S. aureus*  NZ_GG774480.1/1107214-1106853 | GGGGACGUUCAUGGAUUCGACAGGGGUCCCCCGAGCUCAUUAAGCGUGUCGGAGGGUUGUCUUCGUCAUCAACACACACAGUUUAUAAUAACU**GCACGUGACCACAUGGUCCUUCAUGAGUACGUAAAUGCUGCUGGGAUUACAUAAUAACCUAAUCCUAGC**AUCGCCUAACAGCAUUUCCUAUAUGCUGUUAACGCGAUUCAACCUUAAUAGGAUAUGCUAAACACUGCCGUUUGAAGUCUGUUUAGAAGAAACUUAAUCAAGCUAGCAUCAUGUUGGUUGUUUAUCACUUUUCAUGAUGCGAAACCUUUCGAUAAACUACACACGUAGAAAGAUGUGUAUCAGGACCUCUGGACGCGGGUUCAAAUCCCGCCGUCUCCACCA |
| *K. pneumoniae*  NC_017540.1/3743434-3743796 | GGGGCUGAUUCUGGAUUCGACGGGAUUUGCGAAACCCAAGGUGCAUGCCGAGGGGCGGUUGGCCUCGUAAAAAGCCGCAAAAAAUAGUC**GCACGUGACCACAUGGUCCUUCAUGAGUACGUAAAUGCUGCUGGGAUUACAUAAUAACCUAAUCCUAGC**CCUCUCUCCCUAGCUUCCGCUCUUAAGACGGGGAUCAAAGAGAGGUCAAACCCAAAAGAGAUCGCGUGGAUGCCCUGCCUGGGGUUGAAGCGUUAAAUCUCAUCAGGCUAGUUUGUUAGUGGCGUGUCUGUCCGCAGCUGGCAAGCGAAUGUAAAGACUGACUAAGCAUGUAGUGCCGAGGAUGUAGGAAUUUCGGACGCGGGUUCAACUCCCGCCAGCUCCACCA |
| *A. baumannii*  NZ_KB849843.1/1574036-1573677 | GGGGAUGUUAUUGGCUUCGACGCCGGUGAUGAAACUCAUAGAUGCAUGCCGAGAGCGCAUUUUCUCUCGUAAAUAAAAUUUGCAUUUAAAUAGUC**GCACGUGACCACAUGGUCCUUCAUGAGUACGUAAAUGCUGCUGGGAUUACAUAAUAACCUAAUCCUAGC**GUCCGCUUCCUAGAAUACUUGUGGUCUGGGAACCCGACUGAAGCGCACGCACACAAGUCCGUAUAGAGUCAAGCCUCGGGGCUUUAUACCAAACUUAGAGGAUCGCACUUUGUACCCUGUUCGUCGGGUCACUUGGUGUUAAAACAAUAGACGAUAUCUAAGCAUGUAGUAUUCUCGAGCGUAGUGCUGGCGGACGCGGGUUCAACUCCCGCCAUCUCCACCA |
| *P. aeruginosa*  NC_002516.2/901872-901520 | GGGGCCGAUUAGGAUUCGACGCCGGUAACAAAACUUGAGGGGCAUGCCGAGCUGGUAGCAGAACUCGUAAAUUCGCUGCUGCAAACUUAUAGUU**GCACGUGACCACAUGGUCCUUCAUGAGUACGUAAAUGCUGCUGGGAUUACAUAAUAACCUAAUCCUAGC**CAGUCGCUAGGGGAUGCCUGUAAACCCGAAACGACUGUCAGAUAGAACAGGAUCGCCGCCAAGUUCGCUGUAGACGUAACGGCUAAAACUCAUACAGCUCGCUCCAAGCACCCUGCCACUCGGGCGGCGCGGAGUUAACUCAGUAGAGCUGGCUAAGCAUGUAGAACCGAUAGCGGAGAGCUGGCGGACGGGGGUUCAAAUCCCCCCGGCUCCACCA |
| *E. cloacae*  NC_016514.1/3580054-3580417 | GGGGCUGAUUCUGGAUUCGACGGGAUUUGCGAAACCCAAGGUGCAUGCCGAGGGGCGGUUUGCCUCGUAAAAAGCCGCAAAAAAAUAGUC**GCACGUGACCACAUGGUCCUUCAUGAGUACGUAAAUGCUGCUGGGAUUACAUAAUAACCUAAUCCUAGC**CCUCUCUCCCUAGCUUCCGCUCUUAAGACGGGGAUUCAAGAGAGGUCAAACCCAAAAGAGAUCGCGUGGAAGCCCUGCCUGGGGUUGAAGCGUUAAAACUAAUCAGGCUAGUACGUUAGUGGCGUGUUUGUUCGCAGCUGGCGUGCGAAUGUAAAGACAAACUAAGCAUGUAGUACCGAGGAUGUAGAAAUUUCGGACGCGGGUUCAACUCCCGCCAGCUCCACCA |
| *E. coli*  (Guyomar et al ; 2020)  NC_000913.2/2753615-2753977 | GGGGCUGAUUCUGGAUUCGACGGGAUUUGCGAAACCCAAGGUGCAUGCCGAGGGGCGGUUGGCCUCGUAAAAAGCCGCAAAAAAUAGUC**GCACGUGACCACAUGGUCCUUCAUGAGUACGUAAAUGCUGCUGGGAUUACAUAAUAACCUAAUCCUAGC**CCUCUCUCCCUAGCCUCCGCUCUUAGGACGGGGAUCAAGAGAGGUCAAACCCAAAAGAGAUCGCGUGGAAGCCCUGCCUGGGGUUGAAGCGUUAAAACUUAAUCAGGCUAGUUUGUUAGUGGCGUGUCCGUCCGCAGCUGGCAAGCGAAUGUAAAGACUGACUAAGCAUGUAGUACCGAGGAUGUAGGAAUUUCGGACGCGGGUUCAACUCCCGCCAGCUCCACCA |
|  | **tmRNAGFP11V2 sequence** |
| *P. aeruginosa* | GGGGCCGAUUAGGAUUCGACGCCGGUAACAAAACUUGAGGGGCAUGCCGAGCUGGUAGCAGAACUCGUAAAUUCGCUGCUGCAAACUUAUAGUU**GCACGUGACCACAUGGUCCUUCAUGAGUACGUAAAUGCUGCUGGGAUUACAUAA**CUAGCUGCUUAAUGCGGCUAGCAGUCGCUAGGGGAUGCCUGUAAACCCGAAACGACUGUCAGAUAGAACAGGAUCGCCGCCAAGUUCGCUGUAGACGUAACGGCUAAAACUCAUACAGCUCGCUCCAAGCACCCUGCCACUCGGGCGGCGCGGAGUUAACUCAGUAGAGCUGGCUAAGCAUGUAGAACCGAUAGCGGAGAGCUGGCGGACGGGGGUUCAAAUCCCCCCGGCUCCACCA |

**Supplementary Table 2:** *E. coli* and ESKAPESmpB amino acid sequences

| **Species** | **Accession numbers** | **SmpB sequence** |
| --- | --- | --- |
| *E. faecium* | NC_017960.1/2002719-2002255 | MPKGEGKLIAQNKKARHDYSIIDTMEAGMVLQGTEIKSIRNSRINLKDGFIRVRNGEAFLHNVHISPYEQGNIFNHDPLRTRKLLLHKKQIIRLENELKNTGITVVPLKVYIRNGYAKVLIGLAKGKKSYDKREDLKRKDIDRQIDRTLKNFSR |
| *S. aureus* | NZ_GG774480.1/1107769-1107305 | MAKKKSPGTLAENRKARHDYNIEDTIEAGIVLQGTEIKSIRRGSANLKDSYAQVKNGEMYLNNMHIAPYEEGNRFNHDPLRSRKLLLHKREIIKLGDQTREIGYSIVPLKLYLKHGHCKVLLGVARGKKKYDKRQALKEKAVKRDVARDMKARY |
| *K. pneumoniae* | NC_017540.1/3742807-3743289 | MTKKKAHKPGSATIALNKRARHEYFIEDEYEAGLALQGWEVKSLRAGKANIGDSYVILKDGEAFLFGANFTPMAVASTHYVCDPTRTRKLLLNQRELDTLYGRINREGYTVVALSLYWKNAWCKVKIGVAKGKKQHDKRTDLKDREWALDKARIMKHAGR |
| *A. baumannii* | NZ_KB849843.1/1643614-1644090 | MAKATVVKKHNGGTIAQNKRARHDYFIEEKFEAGMSLLGWEVKSLRAGRMSLTESYVIFKNGEAFLFGAQIQPLLSASTHIVPEATRTRKLLLSRRELEKLMGAVNQKGYSCVPLACYWKGHLVKLEIALVKGKQLHDKRATEKERDWQRDKARIFHK |
| *P. aeruginosa* | NC_002516.2/5353783-5354262 | MAKQKKHPSGTIAQNKKALHDYFIEQRFEAGVALAGWEVKSLRAGKAQLVDSYVLLKDGEAWLLGSHITPLTTASTHVIADPVRTRKLLLHKRELGKLFGAVQQKGYACVALSMYWKKHLVKCEIALAKGKKDFDKRHTEKERDSDREIQRAMRHGKDD |
| *E. cloacae* | NC_016514.1/3579482-3579964 | MTKKKAHKPGSATIALNKRARHEYFIEEEFEAGLALQGWEVKSLRAGKANIGDSYVILKDGEAFLFGANFTPLTVASSHYVCDPTRTRKLLLNKRELESLYGRINREGFTVVALSLYWKNAWCKVKVGVAKGKKQHDKRTDLKEREWQLDKARIMKNAGR |
| *E. coli* | NC_000913.2/2752918-2753400 | MTKKKAHKPGSATIALNKRARHEYFIEEEFEAGLALQGWEVKSLRAGKANISDSYVLLRDGEAFLFGANITPMAVASTHVVCDPTRTRKLLLNQRELDSLYGRVNREGYTVVALSLYWKNAWCKVKIGVAKGKKQHDKRSDIKEREWQVDKARIMKNAHR |

**Supplementary Table 3:** Primers and antisense oligonucleotide sequences.

|  | **Name** | **Letter/ Number** | **Sequence** | **Reference** |
| --- | --- | --- | --- | --- |
| **Primers** | GFPfold_for | #1 | **5′** CTCGATCCCGCGAAATTAATACG **3′** | Guyomar  *et al.,* 2020 |
| GFP1-10nonSTOP_rev | #2 | **5′** CTTTTCGTTGGGATCTTTCG **3′** |
| alaGFPfold_rev | #3 | **5′** CCGGCCTAGGTTATGTAATCCCAGCAGCATTTACGTACTCATGAAGGACCATGTGGTCACG**TGC**CTTTTCGTTGGGATCTTTCGAAAG **3′** |
| **Antisense**  **oligonucleotide** | Antisense tmRNA | A | **5'** GCTGCTAAAGCGTAGTTTTCGTCGTT **3'** |

**Supplementary Table 4:** PCR product sequences for *in* *vitro* *trans*-translation. The T7 promoter is underlined, the RBS sequence is green, the start and stop codons are red, and the tmRNA alanine resume codon is orange.

| **Name** | **Sequence** | **Reference.** |
| --- | --- | --- |
| sfGFP1-10 | **5′**CTCGATCCCGCGAAATTAATACGACTCACTATAGGGGAATTGTGAGCGGATAACAATTCCCCTCTAGAAATAATTTTGTTTAACTTTAAGA**AGGAGA**TATACATATGGGTGGCACTAGTAGCAAAGGAGAAGAACTTTTCACTGGAGTTGTCCCAATTCTTGTTGAATTAGATGGTGATGTTAATGGGCACAAATTTTCTGTCAGAGGAGAGGGTGAAGGTGATGCTACAATCGGAAAACTCACCCTTAAATTTATTTGCACTACTGGAAAACTACCTGTTCCATGGCCAACACTTGTCACTACTCTGACCTATGGTGTTCAATGCTTTTCCCGTTATCCGGATCACATGAAAAGGCATGACTTTTTCAAGAGTGCCATGCCCGAAGGTTATGTACAGGAACGCACTATATCTTTCAAAGATGACGGGAAATACAAGACGCGTGCTGTAGTCAAGTTTGAAGGTGATACCCTTGTTAATCGTATCGAGTTAAAGGGTACTGATTTTAAAGAAGATGGAAACATTCTCGGACACAAACTCGAGTACAACTTTAACTCACACAATGTATACATCACGGCAGACAAACAAAAGAATGGAATCAAAGCTAACTTCACAGTTCGCCACAACGTTGAAGATGGTTCCGTTCAACTAGCAGACCATTATCAACAAAATACTCCAATTGGCGATGGCCCTGTCCTTTTACCAGACAACCATTACCTGTCGACACAAACTGTCCTTTCGAAAGATCCCAACGAAAAG**3′** | Guyomar *et al*., 2020 |
| sfalaGFP | **5′**CTCGATCCCGCGAAATTAATACGACTCACTATAGGGGAATTGTGAGCGGATAACAATTCCCCTCTAGAAATAATTTTGTTTAACTTTAAGA**AGGAGA**TATACATATGGGTGGCACTAGTAGCAAAGGAGAAGAACTTTTCACTGGAGTTGTCCCAATTCTTGTTGAATTAGATGGTGATGTTAATGGGCACAAATTTTCTGTCAGAGGAGAGGGTGAAGGTGATGCTACAATCGGAAAACTCACCCTTAAATTTATTTGCACTACTGGAAAACTACCTGTTCCATGGCCAACACTTGTCACTACTCTGACCTATGGTGTTCAATGCTTTTCCCGTTATCCGGATCACATGAAAAGGCATGACTTTTTCAAGAGTGCCATGCCCGAAGGTTATGTACAGGAACGCACTATATCTTTCAAAGATGACGGGAAATACAAGACGCGTGCTGTAGTCAAGTTTGAAGGTGATACCCTTGTTAATCGTATCGAGTTAAAGGGTACTGATTTTAAAGAAGATGGAAACATTCTCGGACACAAACTCGAGTACAACTTTAACTCACACAATGTATACATCACGGCAGACAAACAAAAGAATGGAATCAAAGCTAACTTCACAGTTCGCCACAACGTTGAAGATGGTTCCGTTCAACTAGCAGACCATTATCAACAAAATACTCCAATTGGCGATGGCCCTGTCCTTTTACCAGACAACCATTACCTGTCGACACAAACTGTCCTTTCGAAAGATCCCAACGAAAAG**GCA**CGTGACCACATGGTCCTTCATGAGTACGTAAATGCTGCTGGGATTACATAACCTAGGCCGG**3′** | Guyomar *et al.,* 2020 |

**Supplementary Table 5:** **Plasmid list.** These synthesized sequences were cloned by GenScript in pUC19 between the HindIII and BamHI restriction sites or in pET22b+ between the NdeI and XhoI restriction sites. The T7 promoter is grey and underlined, the eleventh beta-strand is light green, and the mutations making up for the formation of the H5 helix are dark green. BsmB1 or EarI allow generation of the 3 'end of tmRNA. SmpB sequences are codon optimized for *E. coli.*

| pUC19*ESKAPE*tmRNAGFP11 | pUC19*E.faecium*tmRNAGFP11 | aagctTAATACGACTCACTATAGGGGACGTTACGGATTCGACAGGCACAGTCGAGCTTGAATTGCGTTTCGTAGGTTACGTCTACGTAAAAACGTTACAGTTAAATATAACT**GCACGTGACCACATGGTCCTTCATGAGTACGTAAATGCTGCTGGGATTACATAATAACCTAATCCTAGC**GATCCTCTCGGCATCGCCCATGTGCTCGAGTAAGGGTCCTAACTTTAGTGGGATACGTTTCAACTTTCCGTCTGTAAGTTGAAAAAGAGAACATCAGACTAGCGATACAGAATGCCTGTCACTCGGCAAGCTGTAAAGTGAATCCTTAAATGAGTTGACTATGAACGTAGATTTTTAAGTGGCGATGTGTTTGGACGCGGGTTCGACTCCCGCCGTCTCCAcca**C**GAAGAGgatcc |
| --- | --- | --- |
| pUC19*S.aureus*tmRNAGFP11 | aagctTAATACGACTCACTATAGGGGACGTTCATGGATTCGACAGGGGTCCCCCGAGCTCATTAAGCGTGTCGGAGGGTTGTCTTCGTCATCAACACACACAGTTTATAATAACT**GCACGTGACCACATGGTCCTTCATGAGTACGTAAATGCTGCTGGGATTACATAATAACCTAATCCTAGC**ATCGCCTAACAGCATTTCCTATATGCTGTTAACGCGATTCAACCTTAATAGGATATGCTAAACACTGCCGTTTGAAGTCTGTTTAGAAGAAACTTAATCAAGCTAGCATCATGTTGGTTGTTTATCACTTTTCATGATGCGAAACCTTTCGATAAACTACACACGTAGAAAGATGTGTATCAGGACCTCTGGACGCGGGTTCAAATCCCGCCGTCTCCAccat**C**GAAGAGgatcc |
| pUC19*K.pneumoniae*tmRNAGFP11 | aagctTAATACGACTCACTATAGGGGCTGATTCTGGATTCGACGGGATTTGCGAAACCCAAGGTGCATGCCGAGGGGCGGTTGGCCTCGTAAAAAGCCGCAAAAAATAGTC**GCACGTGACCACATGGTCCTTCATGAGTACGTAAATGCTGCTGGGATTACATAATAACCTAATCCTAGC**CCTCTCTCCCTAGCTTCCGCTCTTAAGACGGGGATCAAAGAGAGGTCAAACCCAAAAGAGATCGCGTGGATGCCCTGCCTGGGGTTGAAGCGTTAAATCTCATCAGGCTAGTTTGTTAGTGGCGTGTCTGTCCGCAGCTGGCAAGCGAATGTAAAGACTGACTAAGCATGTAGTGCCGAGGATGTAGGAATTTCGGACGCGGGTTCAACTCCCGCCAGCTCCAccaGGAGACGgatcc |
| pUC19*A.baumannii*tmRNAGFP11 | aagctTAATACGACTCACTATAGGGGATGTTATTGGCTTCGACGCCGGTGATGAAACTCATAGATGCATGCCGAGAGCGCATTTTCTCTCGTAAATAAAATTTGCATTTAAATAGTC**GCACGTGACCACATGGTCCTTCATGAGTACGTAAATGCTGCTGGGATTACATAATAACCTAATCCTAGC**GTCCGCTTCCTAGAATACTTGTGGTCTGGGAACCCGACTGAAGCGCACGCACACAAGTCCGTATAGAGTCAAGCCTCGGGGCTTTATACCAAACTTAGAGGATCGCACTTTGTACCCTGTTCGTCGGGTCACTTGGTGTTAAAACAATAGACGATATCTAAGCATGTAGTATTCTCGAGCGTAGTGCTGGCGGACGCGGGTTCAACTCCCGCCATCTCCAccaGGAGACGgatcc |
| pUC19*P.aeruginosa*tmRNAGFP11 | aagctTAATACGACTCACTATAGGGGCCGATTAGGATTCGACGCCGGTAACAAAACTTGAGGGGCATGCCGAGCTGGTAGCAGAACTCGTAAATTCGCTGCTGCAAACTTATAGTT**GCACGTGACCACATGGTCCTTCATGAGTACGTAAATGCTGCTGGGATTACATAATAACCTAATCCTAGC**CAGTCGCTAGGGGATGCCTGTAAACCCGAAACGACTGTCAGATAGAACAGGATCGCCGCCAAGTTCGCTGTAGACGTAACGGCTAAAACTCATACAGCTCGCTCCAAGCACCCTGCCACTCGGGCGGCGCGGAGTTAACTCAGTAGAGCTGGCTAAGCATGTAGAACCGATAGCGGAGAGCTGGCGGACGGGGGTTCAAATCCCCCCGGCTCCACCAGGAGACGgatcc |
| pUC19*E.cloacae*tmRNAGFP11 | aagctTAATACGACTCACTATAGGGGCTGATTCTGGATTCGACGGGATTTGCGAAACCCAAGGTGCATGCCGAGGGGCGGTTTGCCTCGTAAAAAGCCGCAAAAAAATAGTC**GCACGTGACCACATGGTCCTTCATGAGTACGTAAATGCTGCTGGGATTACATAATAACCTAATCCTAGC**CCTCTCTCCCTAGCTTCCGCTCTTAAGACGGGGATTCAAGAGAGGTCAAACCCAAAAGAGATCGCGTGGAAGCCCTGCCTGGGGTTGAAGCGTTAAAACTAATCAGGCTAGTACGTTAGTGGCGTGTTTGTTCGCAGCTGGCGTGCGAATGTAAAGACAAACTAAGCATGTAGTACCGAGGATGTAGAAATTTCGGACGCGGGTTCAACTCCCGCCAGCTCCAccaGGAGACGgatcc |
| pUC19*P.aeruginosa*tmRNAGFP11V2 | aagctTAATACGACTCACTATAGGGGCCGATTAGGATTCGACGCCGGTAACAAAACTTGAGGGGCATGCCGAGCTGGTAGCAGAACTCGTAAATTCGCTGCTGCAAACTTATAGTT**GCACGTGACCACATGGTCCTTCATGAGTACGTAAATGCTGCTGGGATTACATAA**ctagctgcttaa*TGCGGCTAG*CAGTCGCTAGGGGATGCCTGTAAACCCGAAACGACTGTCAGATAGAACAGGATCGCCGCCAAGTTCGCTGTAGACGTAACGGCTAAAACTCATACAGCTCGCTCCAAGCACCCTGCCACTCGGGCGGCGCGGAGTTAACTCAGTAGAGCTGGCTAAGCATGTAGAACCGATAGCGGAGAGCTGGCGGACGGGGGTTCAAATCCCCCCGGCTCCACCAGGAGACGgatcc |

| pET22b+*ESKAPE*SmpB | pET22b+*E.faecium*SmpB | CAT**ATG**CCGAAGGGCGAGGGCAAACTGATTGCGCAGAACAAGAAAGCGCGTCACGACTACAGCATCATTGATACCATGGAGGCGGGTATGGTGCTGCAAGGCACCGAAATCAAAAGCATTCGTAACAGCCGTATCAACCTGAAGGACGGTTTCATTCGTGTGCGTAACGGCGAGGCGTTTCTGCACAACGTTCACATCAGCCCGTATGAACAGGGTAACATTTTCAACCACGATCCGCTGCGTACCCGTAAACTGCTGCTGCACAAGAAACAAATCATTCGTCTGGAGAACGAACTGAAAAACACCGGTATCACCGTGGTTCCGCTGAAGGTGTACATTCGTAACGGCTATGCGAAGGTTCTGATCGGTCTGGCGAAAGGCAAGAAAAGCTACGACAAGCGTGAAGATCTGAAGCGTAAAGACATCGATCGTCAGATTGACCGTACCCTGAAGAACTTTAGCCGTCTCGAG |
| --- | --- | --- |
| pET22b+*S.aureus*SmpB | CAT**ATG**GCGAAGAAAAAGAGCCCGGGTACCCTGGCGGAGAACCGTAAAGCGCGTCACGACTATAACATCGAGGATACCATTGAAGCGGGTATCGTGCTGCAGGGCACCGAGATCAAGAGCATTCGTCGTGGTAGCGCGAACCTGAAAGACAGCTACGCGCAAGTTAAGAACGGCGAAATGTATCTGAACAACATGCACATTGCGCCGTACGAGGAAGGTAACCGTTTCAACCACGACCCGCTGCGTAGCCGTAAGCTGCTGCTGCACAAACGTGAGATCATTAAGCTGGGTGATCAGACCCGTGAAATTGGCTACAGCATCGTGCCGCTGAAGCTGTATCTGAAACACGGCCACTGCAAAGTGCTGCTGGGTGTTGCGCGTGGCAAAAAGAAATATGATAAGCGTCAAGCGCTGAAGGAAAAAGCGGTGAAACGTGACGTTGCGCGTGATATGAAGGCGCGTTACCTCGAG |
| pET22b+*K.pneumoniae*SmpB | CAT**ATG**ACCAAGAAAAAGGCGCACAAACCGGGTAGCGCGACCATCGCGCTGAACAAGCGTGCGCGTCACGAATACTTCATTGAGGACGAATATGAGGCGGGTCTGGCGCTGCAGGGTTGGGAAGTGAAAAGCCTGCGTGCGGGCAAGGCGAACATCGGCGACAGCTATGTTATTCTGAAAGATGGTGAAGCGTTCCTGTTTGGCGCGAACTTTACCCCGATGGCGGTGGCGAGCACCCACTACGTTTGCGACCCGACCCGTACCCGTAAGCTGCTGCTGAACCAGCGTGAACTGGATACCCTGTACGGTCGTATCAACCGTGAGGGCTATACCGTGGTTGCGCTGAGCCTGTACTGGAAAAACGCGTGGTGCAAAGTGAAGATTGGTGTTGCGAAGGGCAAAAAGCAACACGACAAACGTACCGACCTGAAGGATCGTGAGTGGGCGCTGGATAAAGCGCGTATCATGAAGCACGCGGGCCGTCTCGAG |
| pET22b+*A.baumannii*SmpB | CAT**ATG**GCGAAGGCGACCGTGGTTAAGAAACACAACGGTGGCACCATCGCGCAGAACAAGCGTGCGCGTCACGACTACTTCATTGAGGAAAAATTTGAGGCGGGTATGAGCCTGCTGGGCTGGGAAGTGAAGAGCCTGCGTGCGGGTCGTATGAGCCTGACCGAGAGCTATGTTATCTTCAAAAACGGTGAAGCGTTCCTGTTTGGTGCGCAGATCCAACCGCTGCTGAGCGCGAGCACCCACATTGTGCCGGAGGCGACCCGTACCCGTAAACTGCTGCTGAGCCGTCGTGAGCTGGAAAAGCTGATGGGTGCGGTGAACCAAAAAGGCTACAGCTGCGTTCCGCTGGCGTGCTATTGGAAGGGTCACCTGGTGAAACTGGAAATCGCGCTGGTTAAGGGCAAACAGCTGCACGATAAGCGTGCGACCGAGAAAGAACGTGACTGGCAACGTGATAAGGCGCGTATTTTTCACAAACTCGAG |
| pET22b+*P.aeruginosa*SmpB | CAT**ATG**GCGAAACAGAAGAAACACCCGAGCGGTACCATCGCGCAAAACAAGAAAGCGCTGCACGACTACTTCATTGAGCAGCGTTTTGAAGCGGGTGTGGCGCTGGCGGGTTGGGAAGTGAAAAGCCTGCGTGCGGGCAAGGCGCAACTGGTGGACAGCTATGTTCTGCTGAAAGATGGTGAAGCGTGGCTGCTGGGTAGCCACATTACCCCGCTGACCACCGCGAGCACCCACGTGATTGCGGATCCGGTTCGTACCCGTAAGCTGCTGCTGCACAAACGTGAGCTGGGCAAGCTGTTCGGCGCGGTGCAGCAAAAGGGTTACGCGTGCGTTGCGCTGAGCATGTATTGGAAGAAACACCTGGTGAAATGCGAGATCGCGCTGGCGAAGGGCAAGAAAGACTTTGATAAACGTCACACCGAGAAGGAACGTGACAGCGATCGTGAAATTCAGCGTGCGATGCGTCACGGCAAGGACGATCTCGAG |
| pET22b+*E.cloacae*SmpB | CAT**ATG**ACCAAGAAAAAGGCGCACAAACCGGGTAGCGCGACCATCGCGCTGAACAAGCGTGCGCGTCACGAATACTTCATTGAGGAAGAGTTTGAGGCGGGTCTGGCGCTGCAGGGTTGGGAAGTTAAAAGCCTGCGTGCGGGCAAGGCGAACATCGGCGACAGCTACGTGATTCTGAAAGATGGCGAGGCGTTCCTGTTTGGCGCGAACTTCACCCCGCTGACCGTTGCGAGCAGCCACTATGTGTGCGACCCGACCCGTACCCGTAAACTGCTGCTGAACAAGCGTGAACTGGAGAGCCTGTACGGTCGTATCAACCGTGAAGGCTTTACCGTGGTTGCGCTGAGCCTGTATTGGAAAAACGCGTGGTGCAAAGTGAAGGTTGGTGTGGCGAAGGGCAAAAAGCAGCACGACAAACGTACCGATCTGAAGGAGCGTGAGTGGCAACTGGATAAAGCGCGTATTATGAAGAACGCGGGCCGTCTCGAGCTCGAG |
